# Supplementary material for: A Ternary Map of Ni–Mn–Ga Heusler Alloys from Ab Initio Calculations
Source: MDPI journal article supplement (doi:10.3390/met11060973), 2021-06-17
Supplement: s1 [file s1]

# Supplementary material for "A ternary map of Ni-Mn-Ga Heusler alloys from *ab initio* calculations"

Yulia Sokolovskaya <sup>1</sup>,  Olga Miroshkina <sup>1,2</sup>,  Danil Baigutlin <sup>1,3</sup>,  Vladimir Sokolovskiy <sup>1,4\*</sup>,  Mikhail Zagrebin <sup>1,4,5</sup>,  Vasily Buchelnikov <sup>1,4\*</sup> and Alexey Zayak <sup>6</sup>

<sup>1</sup> Chelyabinsk State University, Chelyabinsk, 454001, Russia; sya2890@mail.ru (Y.S.); miroshkina.on@yandex.ru (O.M.); d0nik1996@mail.ru (D.B.); vsokolovsky84@mail.ru (V.S.); miczag@mail.ru (M.Z.); buche@csu.ru (V.B.)

<sup>2</sup> Faculty of Physics and Center for Nanointegration Duisburg-Essen (CENIDE), University of Duisburg-Essen, Duisburg, 47048, Germany

<sup>3</sup> Department of Physics, School of Engineering Science, LUT University, FI-53850 Lappeenranta, Finland

<sup>4</sup> National University of Science and Technology "MISiS", Moscow, 119049, Russia

<sup>5</sup> South Ural State University (national research university), Chelyabinsk, 454080, Russia

<sup>6</sup> Bowling Green State University, Bowling Green, OH 43403, USA; azayak@bgsu.edu

\* Correspondence: vsokolovsky84@mail.ru (V.S.); buche@csu.ru (V.B.); Tel.: +7-351-799-71-17

Version March 6, 2021 submitted to Metals

## 1. Crystalline and magnetic structures

In the present work, the five cases of atomic arrangement into the cubic Cu<sub>2</sub>MnAl- and Hg<sub>2</sub>CuTi-type Heusler structures are considered in dependence on a nominal composition of Ni-Mn-Ga compounds. The Wyckoff positions for corresponding structures are presented in Table S1. In the case of Cu<sub>2</sub>MnAl-type structure (space group no. 225: *Fm* $\bar{3}$ *m*), the main difference between atomic arrangement considered is related to the occupation of 8*c* Wyckoff positions by an excess kind of atoms in a composition. For Ni-, Ga-, and Mn-rich compounds, the atomic arrangement is denoted as #225, #225', and #225'', correspondingly. In addition, the mixed occupation of 8*c* sites by Ni and Ga atoms is taken into consideration and labelled as #225<sup>mix</sup>. The Hg<sub>2</sub>CuTi-type structure (space group no. 216: *F* $\bar{4}$ 3*m*) is considered only for Mn-rich compounds since it is not preferable for Ni- and Ga-rich compounds.

**Table S1.** Positions of the Ni, Mn and Ga atoms considered in the regular (space group #225) and inverse (space group #216) Heusler structures.

| Wyckoff position                                         | #225 | #225' | #225'' | #216 | #225 <sup>mix</sup> |
|----------------------------------------------------------|------|-------|--------|------|---------------------|
| 4 <i>a</i> (0, 0, 0)                                     | Ga   | Ni    | Ga     | Mn   | Ni                  |
| 4 <i>b</i> ( $\frac{1}{2}, \frac{1}{2}, \frac{1}{2}$ )   | Mn   | Mn    | Ni     | Ni   | Mn                  |
| 8 <i>c</i> * ( $\frac{1}{4}, \frac{1}{4}, \frac{1}{4}$ ) | Ni   | Ga    | Mn     | Mn   | Ga or Ni            |
|                                                          | Ni   | Ga    | Mn     | Ga   | Ga or Ni            |

\* For #216 crystal structure 8*c* Wyckoff position split into two positions: 4*c*(1/4, 1/4, 1/4) and 4*d*(3/4, 3/4, 3/4).

By way of example, Figures S1 and S2 illustrate the 16-atom supercells with mentioned above atomic configurations for stoichiometric Ni<sub>8</sub>Mn<sub>4</sub>Ga<sub>4</sub>, Ga<sub>8</sub>Mn<sub>4</sub>Ni<sub>4</sub>, Mn<sub>8</sub>Ni<sub>4</sub>Ga<sub>4</sub>, and off-stoichiometric Ni<sub>7</sub>Mn<sub>4</sub>Ga<sub>5</sub>, Ni<sub>5</sub>Mn<sub>4</sub>Ga<sub>7</sub>, respectively.

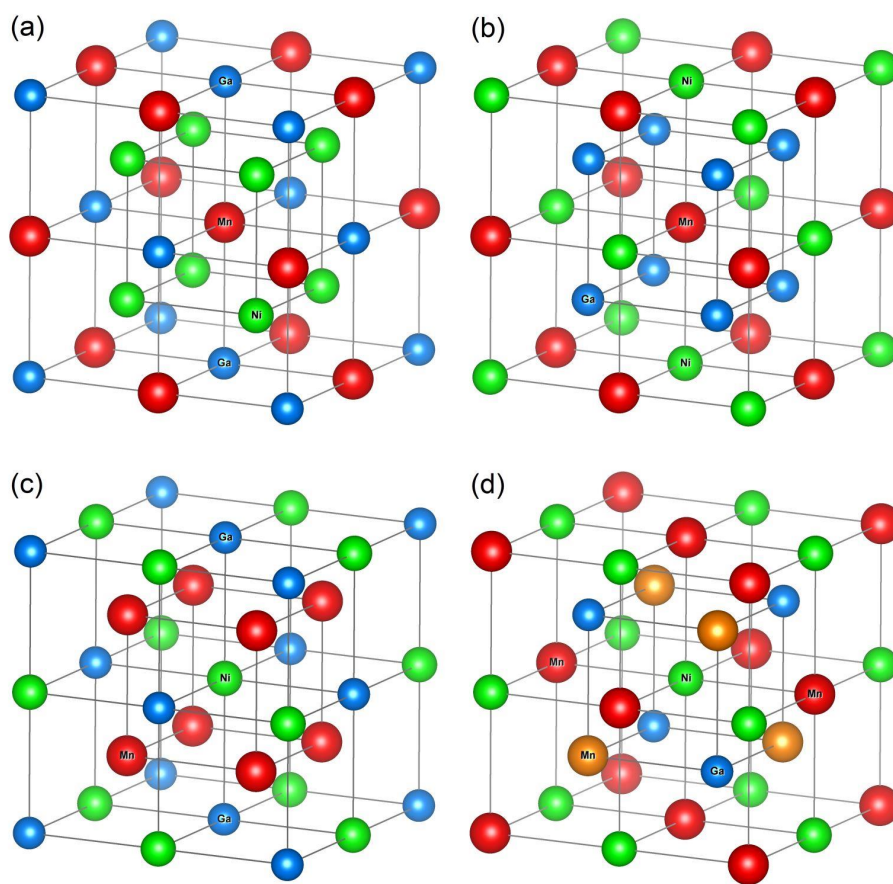

**Figure S1.** (Color online) 16-atom cubic supercells for stoichiometric Ni-Mn-Ga with  $L2_1$  crystal structure. (a)  $\text{Ni}_8\text{Mn}_4\text{Ga}_4$  ( $Fm\bar{3}m$ , #225); (b)  $\text{Ga}_8\text{Mn}_4\text{Ni}_4$  ( $Fm\bar{3}m$ , #225'); (c)  $\text{Mn}_8\text{Ni}_4\text{Ga}_4$  ( $Fm\bar{3}m$ , #225''); (d)  $\text{Mn}_8\text{Ni}_4\text{Ga}_4$  ( $F\bar{4}3m$ , #216). Here, Ni, Mn ( $\text{Mn}_1$  for #216 structure), Ga, and  $\text{Mn}_2$  (for #216 structure) atoms are denoted by green, red, light blue, and orange colors, respectively.

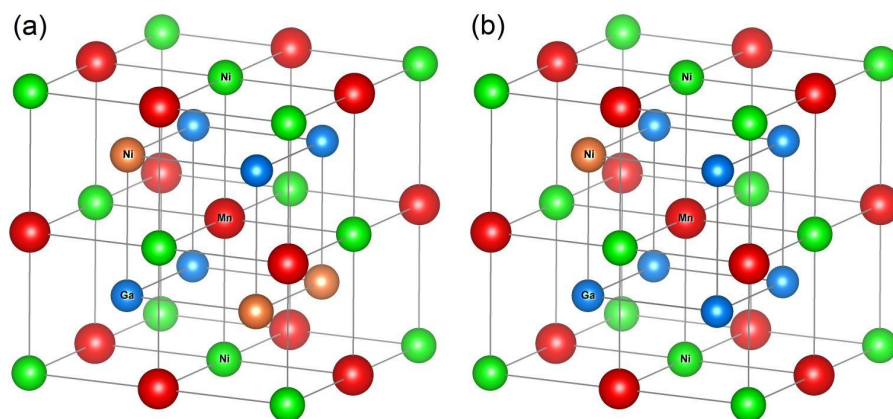

**Figure S2.** (Color online) 16-atom cubic supercells for off-stoichiometric Ni-Mn-Ga with #225<sup>mix</sup> structure: (a)  $\text{Ni}_7\text{Mn}_4\text{Ga}_5$  and (b)  $\text{Ni}_5\text{Mn}_4\text{Ga}_7$ . Here Ni, Mn, Ga, and Ni-excess atoms are denoted by green, red, light blue, and orange colors, respectively.

15 The ferro- and ferrimagnetic (FM and FIM) configurations specified by the Mn spin orientation  
 16 in the compounds with regular and inverse Heusler structures are listed in Table S2. The preferable  
 17 magnetic configurations are depicted in Figures S3 and S4

**Table S2.** The considered orientation of spin magnetic moment of Mn atoms located at different Wyckoff positions in the regular (#225) and inverse (#216) Heusler structures. Here the reversed spin orientation is marked in a red color to enhance visibility. Notice that the Ni spin magnetic moment is aligned along the direction  $\uparrow$ .

| Symmetry group | Magnetic state | $(0,0,0)$    | $\left(\frac{1}{4}, \frac{1}{4}, \frac{1}{4}\right)$ | $\left(\frac{1}{2}, \frac{1}{2}, \frac{1}{2}\right)$ | $\left(\frac{3}{4}, \frac{3}{4}, \frac{3}{4}\right)$ |
|----------------|----------------|--------------|------------------------------------------------------|------------------------------------------------------|------------------------------------------------------|
| #225           | FM             | $\uparrow$   | $\uparrow$                                           | $\uparrow$                                           | $\uparrow$                                           |
|                | FIM-1          | $\uparrow$   | $\downarrow$                                         | $\uparrow$                                           | $\downarrow$                                         |
|                | FIM-2          | $\downarrow$ | $\uparrow$                                           | $\uparrow$                                           | $\uparrow$                                           |
|                | FIM-1(2)       | $\downarrow$ | $\uparrow$                                           | $\downarrow$                                         | $\downarrow$                                         |
| #216           | FM             | $\uparrow$   | $\uparrow$                                           | $\uparrow$                                           | $\uparrow$                                           |
|                | FIM-3          | $\downarrow$ | $\uparrow$                                           | $\uparrow$                                           | $\uparrow$                                           |
|                | FIM-4          | $\uparrow$   | $\uparrow$                                           | $\downarrow$                                         | $\uparrow$                                           |
|                | FIM-5          | $\uparrow$   | $\uparrow$                                           | $\uparrow$                                           | $\downarrow$                                         |
|                | FIM-6          | $\uparrow$   | $\uparrow$                                           | $\downarrow$                                         | $\downarrow$                                         |
|                | FIM-7          | $\downarrow$ | $\uparrow$                                           | $\downarrow$                                         | $\uparrow$                                           |
|                | FIM-8          | $\downarrow$ | $\uparrow$                                           | $\uparrow$                                           | $\downarrow$                                         |
|                | FIM-9          | $\downarrow$ | $\uparrow$                                           | $\downarrow$                                         | $\downarrow$                                         |

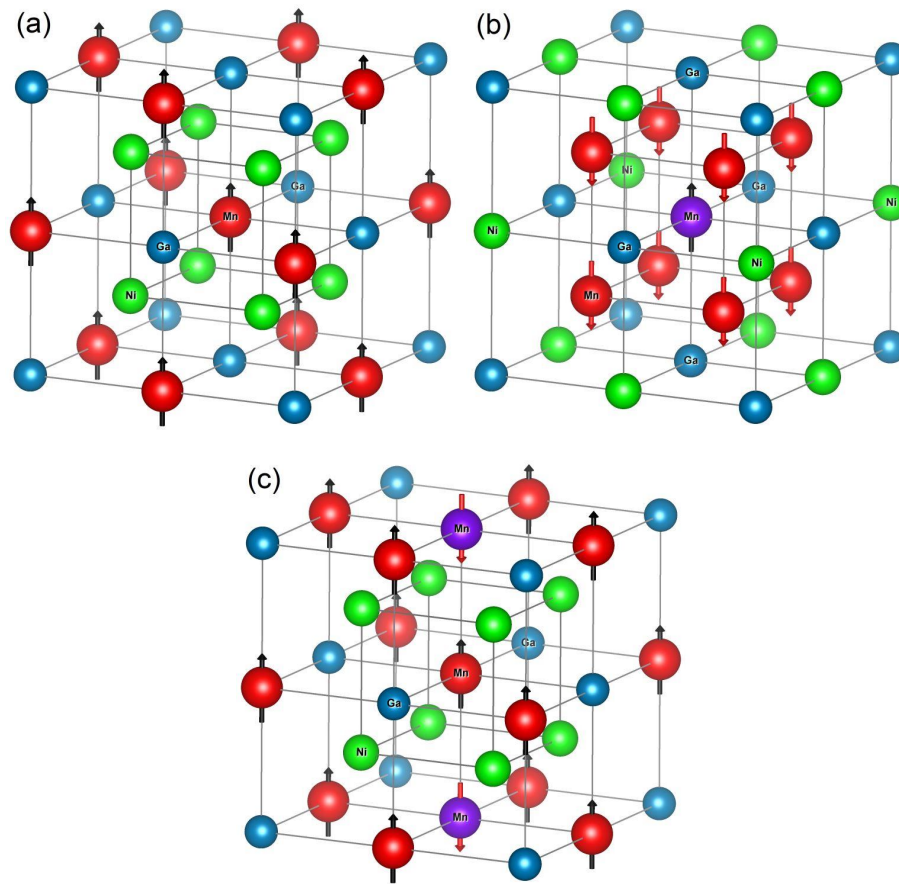

**Figure S3.** (Color online) Structures in a cubic space group #225 for Ni-Mn-Ga with (a) FM, (b) FIM-1, and (c) FIM-2 spin configurations. Here, Ni, Mn, Ga, and Mn-excess atoms are denoted by green, red, light blue, and violet colors, respectively.

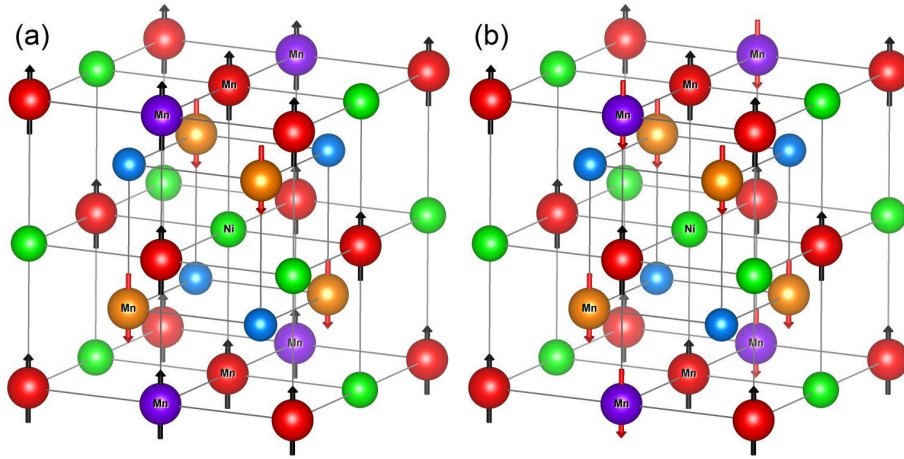

**Figure S4.** (Color online) Structures in a cubic space group #216 for Ni-Mn-Ga with (a) FIM-3, (b) FIM-7 spin configurations. Here Ni, Mn<sub>1</sub>, Mn<sub>2</sub>, Ga, and Mn-excess atoms are denoted by green, red, orange, light blue, and violet colors, respectively.

## 2. Convex hull diagram

Thermodynamic stability of compounds under study is assessed using an energy convex hull implementation in the formation energy-composition space. Figures S5(a) and (b) display the three-dimensional convex hull construction into the formation energy-composition space of Ni-Mn-Ga in the austenitic phase with a cubic structure and martensitic phase with tetragonal and orthorhombic structures. The most of investigated compositions have a negative formation energy but lie above or closely above the convex hull. This finding indicates that compositions are in thermodynamically metastable austenitic or martensitic phase and they can decompose into a mixture of stable binary phases and pure elements. The decomposition energy can be estimated from the cross section of hull energy convex as a difference between the formation energy of a Ni<sub>x</sub>Mn<sub>y</sub>Ga<sub>z</sub> compound and the formation energies of thermodynamically stable compounds, which lie on the convex hull. The cross-sections of the convex hull for Ni<sub>x</sub>Mn<sub>y</sub>Ga<sub>z</sub> ( $y = 25, 50, \text{ and } 75 \text{ at.}\%$ ) in the austenite and martensite phases are presented in Figures S5(c) and (d). It is seen that potentially stable or nearly stable compositions are located closely above the convex hull.

The pivot points (stable compounds) for the convex hull construction are listed in Table S3. As an example, Table S4 contains the possible decomposition reactions for Ni<sub>9</sub>Mn<sub>4</sub>Ga<sub>3</sub>.

**Table S3.** Space group, lattice parameter  $a$  (in Å),  $c/a$  ratio, and total energy  $E_{tot}$  (in eV/atom) per atom for the pivot points of the ternary Ni-Mn-Ga convex hull.

|                                  | Space group | $a$    | $c/a$ | $b/a$ | $E_{tot}$ |
|----------------------------------|-------------|--------|-------|-------|-----------|
| Ga                               | Cmce        | 4.613  | 0.996 | 1.654 | −2.9095   |
| Ga <sub>3</sub> Ni <sub>2</sub>  | P3̄m1       | 4.088  | 1.193 | 1.000 | −4.4588   |
| Ga <sub>3</sub> Ni <sub>5</sub>  | Cmmm        | 6.800  | 0.549 | 1.102 | −5.0696   |
| Ga <sub>5</sub> Ni               | I4/mcm      | 6.406  | 1.506 | 1.000 | −3.5391   |
| Ga <sub>7</sub> Ni <sub>3</sub>  | Im3̄m       | 8.457  | 1.000 | 1.000 | −4.0925   |
| Ga <sub>9</sub> Ni <sub>13</sub> | C2/m        | 9.969  | 0.852 | 0.791 | −4.9915   |
| GaNi <sub>3</sub>                | Pm3̄m       | 3.574  | 1.000 | 1.000 | −5.3482   |
| Mn                               | I4̄3m       | 7.4262 | 1.000 | 1.000 | −9.1617   |
| MnGa                             | P4/mmm      | 2.704  | 1.358 | 1.000 | −6.1611   |
| MnGa <sub>4</sub>                | Im3̄m       | 5.589  | 1.000 | 1.000 | −4.3257   |
| MnNi <sub>3</sub>                | Pm3̄m       | 3.558  | 1.000 | 1.000 | −6.7393   |
| Ni                               | Fm3̄m       | 3.507  | 1.000 | 1.000 | −5.7834   |

**Table S4.** Possible decomposition reactions and the decomposition energy  $E_{dec}$  (in eV/atom) between the investigated alloy and reaction products for  $\text{Ni}_9\text{Mn}_4\text{Ga}_3$ . The positive value indicates the phase instability against the decomposition process and *vice versa*.

| #  | Reaction                                                                                                                                | $E_{dec}$ |
|----|-----------------------------------------------------------------------------------------------------------------------------------------|-----------|
| 1  | $29 \text{ Ni}_9\text{Mn}_4\text{Ga}_3 \rightarrow 4\text{Mn}_{29} + 87\text{Ga}_1\text{Ni}_3$                                          | 0.007     |
| 2  | $2 \text{ Ni}_9\text{Mn}_4\text{Ga}_3 \rightarrow 2\text{Mn}_1\text{Ni}_3 + 3\text{Ni}_4\text{Mn}_2\text{Ga}_2$                         | 0.142     |
| 3  | $232 \text{ Ni}_9\text{Mn}_4\text{Ga}_3 \rightarrow 522\text{Ni}_4 + 32\text{Mn}_{29} + 87\text{Ga}_8$                                  | -0.843    |
| 4  | $116 \text{ Ni}_9\text{Mn}_4\text{Ga}_3 \rightarrow 203\text{Ni}_4 + 16\text{Mn}_{29} + 116\text{Ga}_3\text{Ni}_1$                      | -0.344    |
| 5  | $58 \text{ Ni}_9\text{Mn}_4\text{Ga}_3 \rightarrow 58\text{Ni}_4 + 8\text{Mn}_{29} + 29\text{Ga}_6\text{Ni}_{10}$                       | -0.116    |
| 6  | $580 \text{ Ni}_9\text{Mn}_4\text{Ga}_3 \rightarrow 1218\text{Ni}_4 + 80\text{Mn}_{29} + 87\text{Ga}_{20}\text{Ni}_4$                   | -0.708    |
| 7  | $812 \text{ Ni}_9\text{Mn}_4\text{Ga}_3 \rightarrow 1566\text{Ni}_4 + 112\text{Mn}_{29} + 87\text{Ga}_{28}\text{Ni}_{12}$               | -0.500    |
| 8  | $174 \text{ Ni}_9\text{Mn}_4\text{Ga}_3 \rightarrow 203\text{Ni}_4 + 24\text{Mn}_{29} + 29\text{Ga}_{18}\text{Ni}_{26}$                 | -0.140    |
| 9  | $116 \text{ Ni}_9\text{Mn}_4\text{Ga}_3 \rightarrow 261\text{Ni}_4 + 4\text{Mn}_{29} + 348\text{Mn}_1\text{Ga}_1$                       | -0.655    |
| 10 | $232 \text{ Ni}_9\text{Mn}_4\text{Ga}_3 \rightarrow 522\text{Ni}_4 + 26\text{Mn}_{29} + 87\text{Mn}_2\text{Ga}_8$                       | -0.688    |
| 11 | $116 \text{ Ni}_9\text{Mn}_4\text{Ga}_3 \rightarrow 87\text{Ni}_4 + 4\text{Mn}_{29} + 174\text{Ni}_4\text{Mn}_2\text{Ga}_2$             | 0.030     |
| 12 | $2 \text{ Ni}_9\text{Mn}_4\text{Ga}_3 \rightarrow 3\text{Ni}_4 + 6\text{Mn}_1\text{Ga}_1 + 2\text{Mn}_1\text{Ni}_3$                     | -0.544    |
| 13 | $232 \text{ Ni}_9\text{Mn}_4\text{Ga}_3 \rightarrow 8\text{Mn}_{29} + 87\text{Ga}_8 + 696\text{Mn}_1\text{Ni}_3$                        | -0.509    |
| 14 | $87 \text{ Ni}_9\text{Mn}_4\text{Ga}_3 \rightarrow 5\text{Mn}_{29} + 87\text{Ga}_3\text{Ni}_1 + 203\text{Mn}_1\text{Ni}_3$              | -0.084    |
| 15 | $174 \text{ Ni}_9\text{Mn}_4\text{Ga}_3 \rightarrow 16\text{Mn}_{29} + 87\text{Ga}_6\text{Ni}_{10} + 232\text{Mn}_1\text{Ni}_3$         | 0.033     |
| 16 | $580 \text{ Ni}_9\text{Mn}_4\text{Ga}_3 \rightarrow 24\text{Mn}_{29} + 87\text{Ga}_{20}\text{Ni}_4 + 1624\text{Mn}_1\text{Ni}_3$        | -0.396    |
| 17 | $812 \text{ Ni}_9\text{Mn}_4\text{Ga}_3 \rightarrow 40\text{Mn}_{29} + 87\text{Ga}_{28}\text{Ni}_{12} + 2088\text{Mn}_1\text{Ni}_3$     | -0.213    |
| 18 | $522 \text{ Ni}_9\text{Mn}_4\text{Ga}_3 \rightarrow 44\text{Mn}_{29} + 87\text{Ga}_{18}\text{Ni}_{26} + 812\text{Mn}_1\text{Ni}_3$      | 0.033     |
| 19 | $232 \text{ Ni}_9\text{Mn}_4\text{Ga}_3 \rightarrow 2\text{Mn}_{29} + 87\text{Mn}_2\text{Ga}_8 + 696\text{Mn}_1\text{Ni}_3$             | -0.354    |
| 20 | $4 \text{ Ni}_9\text{Mn}_4\text{Ga}_3 \rightarrow 1\text{Ga}_8 + 4\text{Mn}_1\text{Ga}_1 + 12\text{Mn}_1\text{Ni}_3$                    | -0.447    |
| 21 | $11 \text{ Ni}_9\text{Mn}_4\text{Ga}_3 \rightarrow 6\text{Ga}_3\text{Ni}_1 + 15\text{Mn}_1\text{Ga}_1 + 29\text{Mn}_1\text{Ni}_3$       | -0.192    |
| 22 | $14 \text{ Ni}_9\text{Mn}_4\text{Ga}_3 \rightarrow 3\text{Ga}_6\text{Ni}_{10} + 24\text{Mn}_1\text{Ga}_1 + 32\text{Mn}_1\text{Ni}_3$    | -0.169    |
| 23 | $32 \text{ Ni}_9\text{Mn}_4\text{Ga}_3 \rightarrow 3\text{Ga}_{20}\text{Ni}_4 + 36\text{Mn}_1\text{Ga}_1 + 92\text{Mn}_1\text{Ni}_3$    | -0.368    |
| 24 | $16 \text{ Ni}_9\text{Mn}_4\text{Ga}_3 \rightarrow 1\text{Ga}_{28}\text{Ni}_{12} + 20\text{Mn}_1\text{Ga}_1 + 44\text{Mn}_1\text{Ni}_3$ | -0.258    |
| 25 | $40 \text{ Ni}_9\text{Mn}_4\text{Ga}_3 \rightarrow 3\text{Ga}_{18}\text{Ni}_{26} + 66\text{Mn}_1\text{Ga}_1 + 94\text{Mn}_1\text{Ni}_3$ | -0.162    |
| 26 | $1 \text{ Ni}_9\text{Mn}_4\text{Ga}_3 \rightarrow 1\text{Ga}_1\text{Ni}_3 + 2\text{Mn}_1\text{Ga}_1 + 2\text{Mn}_1\text{Ni}_3$          | -0.212    |
| 27 | $3 \text{ Ni}_9\text{Mn}_4\text{Ga}_3 \rightarrow 1\text{Mn}_1\text{Ga}_1 + 1\text{Mn}_2\text{Ga}_8 + 9\text{Mn}_1\text{Ni}_3$          | -0.350    |

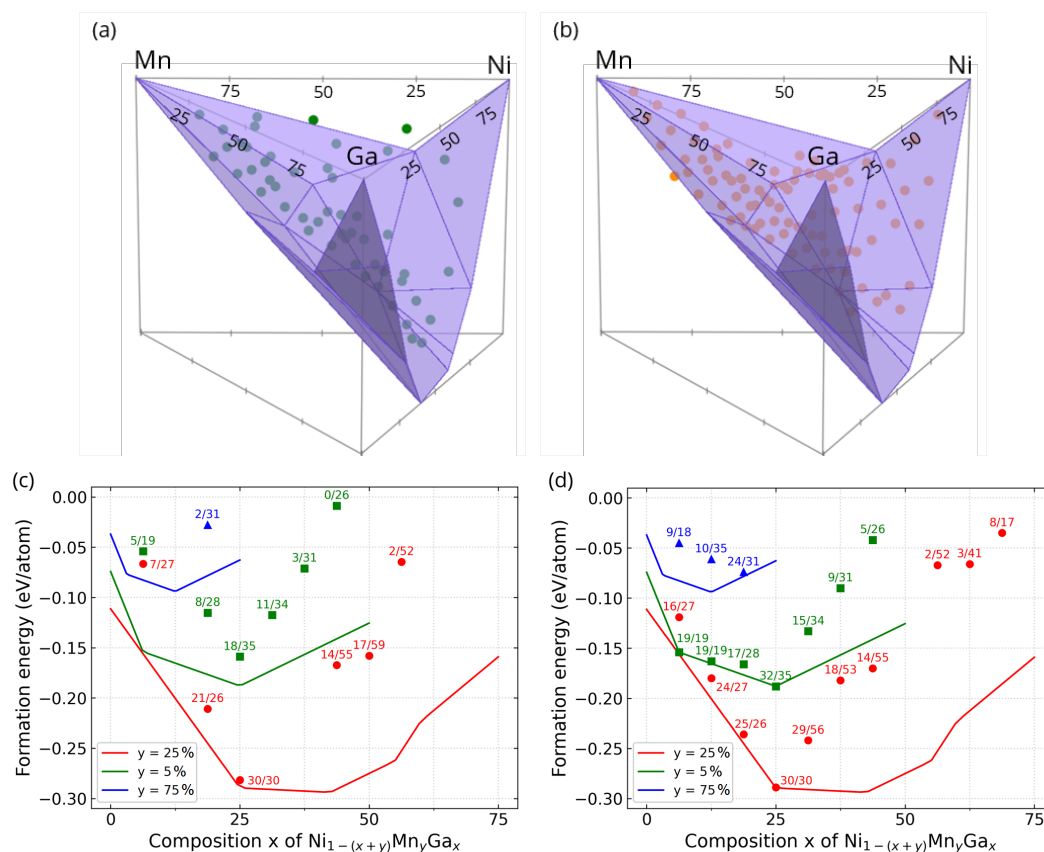

**Figure S5.** (Color online) The three-dimensional convex hull in the formation energy of Ni-Mn-Ga compositions with the (a) austenite and (b) martensite phases. (c), (d) The cross-sections of convex hull plotted at the fixed Mn content ( $y = 25, 50$ , and  $75$  at.%). Here lines denote the profiles of the convex hull. The degree of stable reactions among the possible ones for a particular compound against the decomposition into a mixture of stable phases is also indicated above symbols.

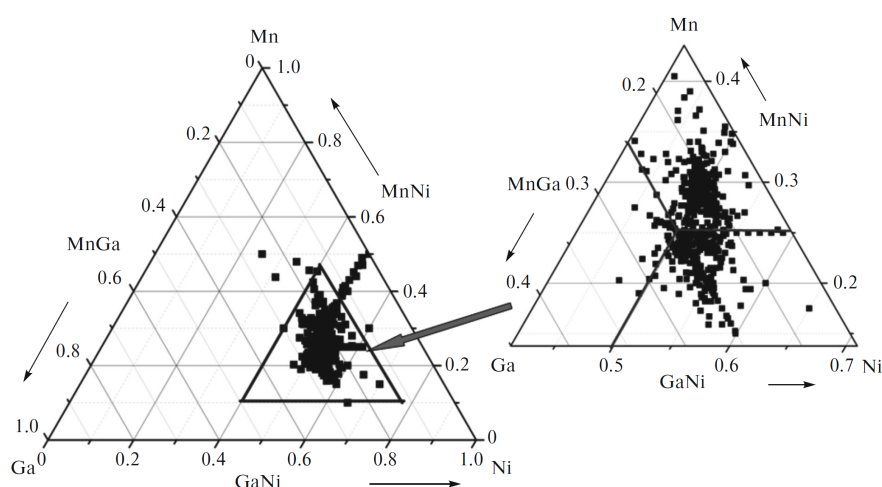

**Figure S6.** Compositional ternary phase diagram of Ni-Mn-Ga compounds from (Sokolovskaya Yu.A., Sokolovskiy V.V., Zagrebin M.A., Buchelnikov V.D., Zayak A.T. Ab Initio Study of the Composite Phase Diagram of Ni-Mn-Ga Shape Memory Alloys. *J. Exp. Theor. Phys.* **2017**, 152, 125–132.). The points map the most studied compositions (about 900) reported in the literature.

### 3. The ground state structure properties of the austenite and martensite phases

The structural ground-state properties and preferable atomic configurations for Ni-Mn-Ga compositions with the austenite and martensite phases are listed in Tables S5-S10, correspondingly. Note, the empty cells denote the unstable compositions. The martensitic transition temperatures  $T_m$  are summarized in Table S16.

### 4. The magnetic configurations of the austenite and martensite phases

The partial and total magnetic moments and preferable magnetic configurations for Ni-Mn-Ga compositions with the austenite and martensite phases are listed in Tables S11-S15, correspondingly. Note, the empty cells denote the unstable compositions.

© 2021 by the authors. Submitted to *Metals* for possible open access publication under the terms and conditions of the Creative Commons Attribution (CC BY) license (<http://creativecommons.org/licenses/by/4.0/>).

**Table S5.** Optimized lattice constants  $a$ ,  $b$ ,  $c$  (in Å) and their ratios, the total energy  $E_{tot}$  and the formation energy  $E_{form}$  (in eV/atom) as well as the preferable structure for compounds in the austenite phase from the area I.

| Area I – austenite phase |       |       |                    |       |       |       |       |            |            |           |
|--------------------------|-------|-------|--------------------|-------|-------|-------|-------|------------|------------|-----------|
| Concentration (at.%)     |       |       | Lattice parameters |       |       | $b/a$ | $c/a$ | $E_{tot}$  | $E_{form}$ | Structure |
| Ni                       | Mn    | Ga    | $a$                | $b$   | $c$   |       |       |            |            |           |
| 6.25                     | 6.25  | 87.5  |                    |       |       |       |       |            |            |           |
| 6.25                     | 12.5  | 81.25 |                    |       |       |       |       |            |            |           |
| 6.25                     | 18.75 | 75    |                    |       |       |       |       |            |            |           |
| 6.25                     | 25    | 68.75 |                    |       |       |       |       |            |            |           |
| 12.5                     | 6.25  | 81.25 |                    |       |       |       |       |            |            |           |
| 12.5                     | 12.5  | 75    |                    |       |       |       |       |            |            |           |
| 12.5                     | 18.75 | 68.75 |                    |       |       |       |       |            |            |           |
| 12.5                     | 25    | 62.5  |                    |       |       |       |       |            |            |           |
| 18.75                    | 6.25  | 75    | 6.263              |       |       | 1.000 | 1.000 | -3.838     | 0.001      | 225'      |
| 18.75                    | 12.5  | 68.75 |                    |       |       |       |       |            |            |           |
| 18.75                    | 18.75 | 62.5  |                    |       |       |       |       |            |            |           |
| 18.75                    | 25    | 56.25 | 6.047              |       | 6.047 | 1.000 | 1.000 | -5.076     | -0.065     | 225'      |
| 25                       | 6.25  | 68.75 | 6.158              |       | 6.156 | 1.000 | 1.000 | -4.025     | -0.006     | 225'      |
| 25                       | 12.5  | 62.5  |                    |       |       |       |       |            |            | 225'      |
| 25                       | 18.75 | 56.25 | 6.002              | 6.002 | 6.002 | 1.000 | 1.000 | -4.923     | -0.123     | 225'      |
| 25                       | 25    | 50    | 5.948              | 5.948 | 5.948 | 1.000 | 1.000 | -5.349     | -0.158     |           |
| 31.25                    | 6.25  | 62.5  |                    |       |       |       |       |            |            | 225''     |
| 31.25                    | 12.5  | 56.25 |                    |       |       |       |       |            |            |           |
| 31.25                    | 18.75 | 50    | 5.907              | 5.907 | 5.907 | 1.000 | 1.000 | -5.203     | -0.223     | 225''     |
| 31.25                    | 25    | 43.75 | 5.906              | 5.906 | 5.906 | 1.000 | 1.000 | -5.538     | -0.167     | 225''     |
| 37.5                     | 6.25  | 56.25 | 5.932              | 5.932 | 5.935 | 1.000 | 1.000 | -4.586     | -0.208     | 225''     |
| 37.5                     | 12.5  | 50    |                    |       |       |       |       |            |            |           |
| 37.5                     | 18.75 | 43.75 | 5.866              | 5.866 | 5.864 | 1.000 | 1.000 | -5.375     | -0.215     | 225''     |
| 37.5                     | 25    | 37.5  |                    |       |       |       |       |            |            |           |
| 43.75                    | 6.25  | 50    | 5.846              | 5.846 | 5.846 | 1.000 | 1.000 | -4.875     | -0.317     | 225''     |
| 43.75                    | 12.5  | 43.75 |                    |       |       |       |       |            |            | 225''     |
| 43.75                    | 18.75 | 37.5  | 5.907              | 5.835 | 5.837 | 0.988 | 0.988 | -5.576     | -0.237     | 225''     |
| 43.75                    | 25    | 31.25 |                    |       |       |       |       |            |            |           |
| 50                       | 6.25  | 43.75 | 5.821              | 5.821 | 5.820 | 1.000 | 1.000 | -5.073     | -0.336     | 225       |
| 50                       | 12.5  | 37.5  | 5.783              | 5.872 | 5.783 | 1.015 | 1.000 | -5.446     | -0.318     | 225       |
| 50                       | 18.75 | 31.25 | 5.806              | 5.806 | 5.805 | 1.000 | 1.000 | -5.819     | -0.300     | 225       |
| 50                       | 25    | 25    | 5.811              | 5.811 | 5.811 | 1.000 | 1.000 | -6.191     | -0.281     | 225       |
| 56.25                    | 6.25  | 37.5  | 5.773              | 5.770 | 5.814 | 1.000 | 1.007 | -5.228     | -0.311     | 225       |
| 56.25                    | 12.5  | 31.25 | 5.773              | 5.773 | 5.791 | 1.000 | 1.003 | -5.6       | -0.292     | 225       |
| 56.25                    | 18.75 | 25    | 5.769              | 5.769 | 5.769 | 1.000 | 1.000 | -5.971     | -0.273     | 225       |
| 56.25                    | 25    | 18.75 | 5.775              | 5.774 | 5.775 | 1.000 | 1.000 | -6.2999375 | -0.211     | 225       |
| 62.5                     | 6.25  | 31.25 |                    |       |       |       |       |            |            |           |
| 62.5                     | 12.5  | 25    |                    |       |       |       |       |            |            |           |
| 62.5                     | 18.75 | 18.75 |                    |       |       |       |       |            |            | 225       |
| 62.5                     | 25    | 12.5  |                    |       |       |       |       |            |            | 225       |
| 68.75                    | 6.25  | 25    | 5.710              | 5.710 | 5.709 | 1.000 | 1.000 | -5.533     | -0.257     | 225       |
| 68.75                    | 12.5  | 18.75 |                    |       |       |       |       |            |            | 225       |
| 68.75                    | 18.75 | 12.5  |                    |       |       |       |       |            |            | 225       |
| 68.75                    | 25    | 6.25  | 5.696              | 5.696 | 5.695 | 1.000 | 1.000 | -6.515     | -0.067     | 225       |
| 75                       | 6.25  | 18.75 | 5.683              | 5.683 | 5.681 | 1.000 | 1.000 | -5.616     | -0.160     | 225       |
| 75                       | 12.5  | 12.5  | 5.681              | 5.683 | 5.679 | 1.000 | 1.000 | -5.951     | -0.105     | 225       |
| 75                       | 18.75 | 6.25  |                    |       |       |       |       |            |            |           |
| 81.25                    | 6.25  | 12.5  |                    |       |       |       |       |            |            |           |
| 81.25                    | 12.5  | 6.25  |                    |       |       |       |       |            |            |           |
| 87.5                     | 6.25  | 6.25  |                    |       |       |       |       |            |            |           |



**Table S6.** Optimized lattice constants  $a$ ,  $b$ ,  $c$  (in Å) and their ratios, the total energy  $E_{tot}$  and the formation energy  $E_{form}$  (in eV/atom) as well as the preferable structure for compounds in the austenite phase from the area II.

| Area II – austenite phase |       |       |                    |       |       |       |       |           |            |           |
|---------------------------|-------|-------|--------------------|-------|-------|-------|-------|-----------|------------|-----------|
| Concentration (at.%)      |       |       | Lattice parameters |       |       | $b/a$ | $c/a$ | $E_{tot}$ | $E_{form}$ | Structure |
| Ni                        | Mn    | Ga    | $a$                | $b$   | $c$   |       |       |           |            |           |
| 62.5                      | 31.25 | 6.25  |                    |       |       |       |       |           |            | 225       |
| 56.25                     | 31.25 | 12.5  |                    |       |       |       |       |           |            | 225       |
| 56.25                     | 37.5  | 6.25  |                    |       |       |       |       |           |            |           |
| 50                        | 31.25 | 18.75 | 5.794              | 5.794 | 5.790 | 1.000 | 0.999 | -6.518    | -0.218     | 225       |
| 50                        | 37.5  | 12.5  |                    |       |       |       |       |           |            | 225       |
| 50                        | 43.75 | 6.25  | 5.788              | 5.788 | 5.786 | 1.000 | 1.000 | -7.172    | -0.090     | 225       |
| 43.75                     | 31.25 | 25    | 5.808              | 5.808 | 5.807 | 1.000 | 1.000 | -6.367    | -0.246     | 225       |
| 43.75                     | 37.5  | 18.75 | 5.811              | 5.811 | 5.810 | 1.000 | 1.000 | -6.692    | -0.181     | 225       |
| 43.75                     | 43.75 | 12.5  | 5.819              | 5.819 | 5.821 | 1.000 | 1.000 | -7.021    | -0.119     | 225       |
| 37.5                      | 31.25 | 31.25 | 5.875              | 5.860 | 5.858 | 0.998 | 0.997 | -6.138    | -0.197     | 225       |
| 37.5                      | 37.5  | 25    | 5.780              | 5.793 | 5.793 | 1.002 | 1.002 | -6.549    | -0.217     | 225       |
| 37.5                      | 43.75 | 18.75 |                    |       |       |       |       |           |            |           |
| 31.25                     | 31.25 | 37.5  |                    |       |       |       |       |           |            |           |
| 31.25                     | 37.5  | 31.25 |                    |       |       |       |       |           |            |           |
| 31.25                     | 43.75 | 25    | 5.815              | 5.815 | 5.755 | 1.000 | 0.990 | -6.737    | -0.194     | 225       |
| 25                        | 31.25 | 43.75 | 5.904              | 5.904 | 5.902 | 1.000 | 1.000 | -5.717    | -0.135     | 225'      |
| 25                        | 37.5  | 37.5  |                    |       |       |       |       |           |            |           |
| 25                        | 43.75 | 31.25 |                    |       |       |       |       |           |            |           |
| 18.75                     | 31.25 | 50    | 5.961              | 5.961 | 5.959 | 1.000 | 1.000 | -5.543    | -0.141     | 225'      |
| 18.75                     | 37.5  | 43.75 | 5.913              | 5.913 | 5.911 | 1.000 | 1.000 | -5.938    | -0.145     | 225'      |
| 18.75                     | 43.75 | 37.5  |                    |       |       |       |       |           |            |           |
| 12.5                      | 31.25 | 56.25 |                    |       |       |       |       |           |            |           |
| 12.5                      | 37.5  | 50    |                    |       |       |       |       |           |            |           |
| 12.5                      | 43.75 | 43.75 |                    |       |       |       |       |           |            |           |
| 6.25                      | 31.25 | 62.5  |                    |       |       |       |       |           |            |           |
| 6.25                      | 37.5  | 56.25 |                    |       |       |       |       |           |            |           |
| 6.25                      | 43.75 | 50    | 5.921              | 5.921 | 5.919 | 1.000 | 1.000 | -5.903    | -0.079     | 225'      |

**Table S7.** Optimized lattice constants  $a$ ,  $b$ ,  $c$  (in Å) and their ratios, the total energy  $E_{tot}$  and the formation energy  $E_{form}$  (in eV/atom) as well as the preferable structure for compounds in the austenite phase from the area III.

| Area III – austenite phase |       |       |                    |       |       |       |       |           |            |           |
|----------------------------|-------|-------|--------------------|-------|-------|-------|-------|-----------|------------|-----------|
| Concentration (at.%)       |       |       | Lattice parameters |       |       | $b/a$ | $c/a$ | $E_{tot}$ | $E_{form}$ | Structure |
| Ni                         | Mn    | Ga    | $a$                | $b$   | $c$   |       |       |           |            |           |
| 43.75                      | 50    | 6.25  | 5.761              | 5.761 | 5.755 | 1.000 | 0.999 | -7.347    | -0.054     | 216       |
| 37.5                       | 50    | 12.5  |                    |       |       |       |       |           |            |           |
| 37.5                       | 56.25 | 6.25  |                    |       |       |       |       |           |            |           |
| 31.25                      | 50    | 18.75 | 5.844              | 5.844 | 5.840 | 1.000 | 0.999 | -7.049    | -0.115     | 216       |
| 31.25                      | 56.25 | 12.5  |                    |       |       |       |       |           |            |           |
| 31.25                      | 62.5  | 6.25  |                    |       |       |       |       |           |            |           |
| 25                         | 50    | 25    | 5.840              | 5.840 | 5.840 | 1.000 | 1.000 | -6.913    | -0.159     | 216       |
| 25                         | 56.25 | 18.75 | 5.827              | 5.827 | 5.827 | 1.000 | 1.000 | -7.236    | -0.091     | 216       |
| 25                         | 62.5  | 12.5  | 5.859              | 5.836 | 5.836 | 0.996 | 0.996 | -7.576    | -0.040     | 216       |
| 25                         | 68.75 | 6.25  | 5.850              | 5.850 | 5.850 | 1.000 | 1.000 | -7.91     | 0.016      | 216       |
| 18.75                      | 50    | 31.25 | 5.917              | 5.917 | 5.917 | 1.000 | 1.000 | -6.692    | -0.118     | 216       |
| 18.75                      | 56.25 | 25    | 5.825              | 5.825 | 5.825 | 1.000 | 1.000 | -7.101    | -0.136     | 216       |
| 18.75                      | 62.5  | 18.75 | 5.820              | 5.820 | 5.820 | 1.000 | 1.000 | -7.433    | -0.077     | 216       |
| 18.75                      | 68.75 | 12.5  |                    |       |       |       |       |           |            |           |
| 18.75                      | 75    | 6.25  | 5.804              | 5.804 | 5.804 | 1.000 | 1.000 | -8.095    | 0.043      | 216       |
| 12.5                       | 50    | 37.5  | 5.990              | 5.990 | 5.952 | 1.000 | 0.994 | -6.466    | -0.071     | 216       |
| 12.5                       | 56.25 | 31.25 | 5.889              | 5.903 | 5.903 | 1.002 | 1.002 | -6.878    | -0.092     | 216       |
| 12.5                       | 62.5  | 25    | 5.830              | 5.830 | 5.796 | 1.000 | 0.994 | -7.284    | -0.108     | 216       |
| 12.5                       | 68.75 | 18.75 | 5.828              | 5.828 | 5.759 | 1.000 | 0.988 | -7.618    | -0.051     | 216       |
| 12.5                       | 75    | 12.5  |                    |       |       |       |       |           |            |           |
| 12.5                       | 81.25 | 6.25  |                    |       |       |       |       |           |            |           |
| 6.25                       | 50    | 43.75 | 6.042              | 6.042 | 6.040 | 1.000 | 1.000 | -6.224    | -0.009     | 216       |
| 6.25                       | 56.25 | 37.5  | 5.977              | 5.977 | 5.946 | 1.000 | 0.995 | -6.649    | -0.043     | 216       |
| 6.25                       | 62.5  | 31.25 | 5.915              | 5.915 | 5.829 | 1.000 | 0.985 | -7.054    | -0.057     | 216       |
| 6.25                       | 68.75 | 25    | 5.821              | 5.821 | 5.821 | 1.000 | 1.000 | -7.469    | -0.081     | 216       |
| 6.25                       | 75    | 18.75 | 5.792              | 5.792 | 5.792 | 1.000 | 1.000 | -7.806    | -0.028     | 216       |
| 6.25                       | 81.25 | 12.5  |                    |       |       |       |       |           |            |           |
| 6.25                       | 87.5  | 6.25  |                    |       |       |       |       |           |            |           |

**Table S8.** Optimized lattice constants  $a$ ,  $b$ ,  $c$  (in Å) and their ratios, the total energy  $E_{tot}$  and the formation energy  $E_{form}$  (in eV/atom) for compounds in the martensite phase from the area I.

| Area I – martensite phase |       |       |                    |       |       |       |       |           |            |
|---------------------------|-------|-------|--------------------|-------|-------|-------|-------|-----------|------------|
| Concentration (at.%)      |       |       | Lattice parameters |       |       | $b/a$ | $c/a$ | $E_{tot}$ | $E_{form}$ |
| Ni                        | Mn    | Ga    | $a$                | $b$   | $c$   |       |       |           |            |
| 6.25                      | 6.25  | 87.5  |                    |       |       |       |       |           |            |
| 6.25                      | 12.5  | 81.25 | 5.993              | 5.521 | 7.865 | 0.921 | 1.312 | -3.859    | 0.012      |
| 6.25                      | 18.75 | 75    | 5.756              | 5.306 | 8.034 | 0.922 | 1.396 | -4.24     | 0.021      |
| 6.25                      | 25    | 68.75 | 5.312              |       | 7.952 | 1.000 | 1.497 | -4.687    | -0.035     |
| 12.5                      | 6.25  | 81.25 | 5.737              |       | 7.893 | 1.000 | 1.376 | -3.683    | -0.023     |
| 12.5                      | 12.5  | 75    | 5.527              | 5.734 | 7.866 | 1.037 | 1.423 | -4.06     | -0.010     |
| 12.5                      | 18.75 | 68.75 | 5.486              |       | 7.813 | 1.000 | 1.424 | -4.453    | -0.012     |
| 12.5                      | 25    | 62.5  | 5.334              |       | 7.853 | 1.000 | 1.472 | -4.898    | -0.066     |
| 18.75                     | 6.25  | 75    | 5.615              |       | 7.718 | 1.000 | 1.374 | -3.867    | -0.028     |
| 18.75                     | 12.5  | 68.75 | 5.909              | 5.339 | 7.330 | 0.904 | 1.240 | -4.269    | -0.039     |
| 18.75                     | 18.75 | 62.5  | 5.554              |       | 7.296 |       | 1.314 | -4.668    | -0.047     |
| 18.75                     | 25    | 56.25 | 5.412              |       | 7.402 |       | 1.368 | -5.078    | -0.067     |
| 25                        | 6.25  | 68.75 | 5.487              |       | 7.661 | 1.000 | 1.396 | -4.069    | -0.050     |
| 25                        | 12.5  | 62.5  | 5.974              | 5.998 | 6.231 | 1.004 | 1.043 | -4.48     | -0.070     |
| 25                        | 18.75 | 56.25 |                    |       |       |       |       |           |            |
| 25                        | 25    | 50    | run                |       |       |       |       |           |            |
| 31.25                     | 6.25  | 62.5  | 5.475              | 5.475 | 7.752 | 1.000 | 1.416 | -4.362    | -0.164     |
| 31.25                     | 12.5  | 56.25 | 5.619              | 5.619 | 6.687 | 1.000 | 1.190 | -4.765    | -0.176     |
| 31.25                     | 18.75 | 50    |                    |       |       |       |       |           |            |
| 31.25                     | 25    | 43.75 | 5.628              | 5.628 | 6.506 | 1.000 | 1.156 | -5.541    | -0.170     |
| 37.5                      | 6.25  | 56.25 |                    |       |       |       |       |           |            |
| 37.5                      | 12.5  | 50    | 5.742              | 5.742 | 6.110 | 1.000 | 1.064 | -5.046    | -0.277     |
| 37.5                      | 18.75 | 43.75 |                    |       |       |       |       |           |            |
| 37.5                      | 25    | 37.5  | 6.098              | 5.813 | 5.811 | 0.953 | 0.953 | -5.732    | -0.182     |
| 43.75                     | 6.25  | 50    |                    |       |       |       |       |           |            |
| 43.75                     | 12.5  | 43.75 |                    |       |       |       |       |           |            |
| 43.75                     | 18.75 | 37.5  | 5.397              | 5.397 | 6.897 | 1.000 | 1.278 | -5.576    | -0.237     |
| 43.75                     | 25    | 31.25 | 5.373              | 5.373 | 6.900 | 1.000 | 1.284 | -5.972    | -0.242     |
| 50                        | 6.25  | 43.75 |                    |       |       |       |       |           |            |
| 50                        | 12.5  | 37.5  |                    |       |       |       |       |           |            |
| 50                        | 18.75 | 31.25 |                    |       |       |       |       |           |            |
| 50                        | 25    | 25    | 5.380              | 5.380 | 6.759 | 1.000 | 1.256 | -6.199    | -0.289     |
| 56.25                     | 6.25  | 37.5  |                    |       |       |       |       |           |            |
| 56.25                     | 12.5  | 31.25 | 5.424              | 5.424 | 6.552 | 1.000 | 1.208 | -5.602    | -0.294     |
| 56.25                     | 18.75 | 25    | 5.354              | 5.354 | 6.689 | 1.000 | 1.249 | -5.982    | -0.284     |
| 56.25                     | 25    | 18.75 | 5.301              | 5.279 | 6.848 | 0.996 | 1.292 | -6.325    | -0.236     |
| 62.5                      | 6.25  | 31.25 | 5.324              | 5.324 | 6.681 | 1.000 | 1.255 | -5.402    | -0.306     |
| 62.5                      | 12.5  | 25    | 5.289              | 5.289 | 6.727 | 1.000 | 1.272 | -5.782    | -0.295     |
| 62.5                      | 18.75 | 18.75 | 5.230              | 5.274 | 6.814 | 1.008 | 1.303 | -6.097    | -0.219     |
| 62.5                      | 25    | 12.5  | 5.172              | 5.189 | 6.952 | 1.003 | 1.344 | -6.449    | -0.180     |
| 68.75                     | 6.25  | 25    | 5.238              | 5.238 | 6.758 | 1.000 | 1.290 | -5.556    | -0.280     |
| 68.75                     | 12.5  | 18.75 | 5.188              | 5.226 | 6.851 | 1.007 | 1.321 | -5.861    | -0.194     |
| 68.75                     | 18.75 | 12.5  | 5.128              | 5.167 | 6.969 | 1.008 | 1.359 | -6.232    | -0.174     |
| 68.75                     | 25    | 6.25  | 5.100              | 5.100 | 7.075 | 1.000 | 1.387 | -6.567    | -0.119     |
| 75                        | 6.25  | 18.75 | 5.141              | 5.141 | 6.916 | 1.000 | 1.345 | -5.65     | -0.194     |
| 75                        | 12.5  | 12.5  | 5.108              | 5.118 | 6.981 | 1.002 | 1.367 | -5.998    | -0.152     |
| 75                        | 18.75 | 6.25  | 5.050              | 5.077 | 7.086 | 1.005 | 1.403 | -6.357    | -0.120     |
| 81.25                     | 6.25  | 12.5  | 5.044              | 5.064 | 7.051 | 1.004 | 1.398 | -5.773    | -0.138     |
| 81.25                     | 12.5  | 6.25  | 5.055              | 5.055 | 7.051 | 1.000 | 1.395 | -6.11     | -0.084     |
| 87.5                      | 6.25  | 6.25  | 5.201              | 6.529 | 5.154 | 1.255 | 0.991 | -5.86     | -0.045     |

**Table S9.** Optimized lattice constants  $a$ ,  $b$ ,  $c$  (in Å) and their ratios, the total energy  $E_{tot}$  and the formation energy  $E_{form}$  (in eV/atom) for compounds in the martensite phase from the area II.

| Area II – martensite phase |       |       |                    |       |       |       |       |           |            |
|----------------------------|-------|-------|--------------------|-------|-------|-------|-------|-----------|------------|
| Concentration (at.%)       |       |       | Lattice parameters |       |       | $b/a$ | $c/a$ | $E_{tot}$ | $E_{form}$ |
| Ni                         | Mn    | Ga    | $a$                | $b$   | $c$   |       |       |           |            |
| 62.5                       | 31.25 | 6.25  | 5.130              | 5.139 | 7.023 | 1.002 | 1.369 | -6.791    | -0.131     |
| 56.25                      | 31.25 | 12.5  | 5.202              | 5.202 | 6.985 | 1.000 | 1.343 | -6.665    | -0.185     |
| 56.25                      | 37.5  | 6.25  | 5.155              | 5.156 | 7.053 | 1.000 | 1.368 | -7.01     | -0.139     |
| 50                         | 31.25 | 18.75 | 5.276              | 5.276 | 6.916 | 1.000 | 1.311 | -6.539    | -0.239     |
| 50                         | 37.5  | 12.5  | 5.211              | 5.220 | 7.029 | 1.002 | 1.349 | -6.882    | -0.191     |
| 50                         | 43.75 | 6.25  | 5.209              | 5.209 | 6.904 | 1.000 | 1.325 | -7.215    | -0.133     |
| 43.75                      | 31.25 | 25    | 5.363              | 5.363 | 6.767 | 1.000 | 1.262 | -6.376    | -0.255     |
| 43.75                      | 37.5  | 18.75 | 5.293              | 5.293 | 6.914 | 1.000 | 1.306 | -6.713    | -0.202     |
| 43.75                      | 43.75 | 12.5  | 5.193              | 5.193 | 7.105 | 1.000 | 1.368 | -7.054    | -0.152     |
| 37.5                       | 31.25 | 31.25 | 5.388              | 5.368 | 6.940 | 0.996 | 1.288 | -6.152    | -0.211     |
| 37.5                       | 37.5  | 25    | 5.353              | 5.374 | 6.781 | 1.004 | 1.267 | -6.562    | -0.230     |
| 37.5                       | 43.75 | 18.75 | 5.352              | 5.350 | 6.802 | 1.000 | 1.271 | -6.892    | -0.169     |
| 31.25                      | 31.25 | 37.5  | 5.281              | 5.281 | 7.287 | 1.000 | 1.380 | -5.929    | -0.168     |
| 31.25                      | 37.5  | 31.25 | 5.405              | 5.368 | 6.927 | 0.993 | 1.282 | -6.341    | -0.189     |
| 31.25                      | 43.75 | 25    | 5.347              | 5.347 | 6.860 | 1.000 | 1.283 | -6.751    | -0.208     |
| 25                         | 31.25 | 43.75 | 5.573              | 5.573 | 6.650 | 1.000 | 1.193 | -5.733    | -0.151     |
| 25                         | 37.5  | 37.5  | 5.407              | 5.407 | 7.130 | 1.000 | 1.319 | -6.132    | -0.159     |
| 25                         | 43.75 | 31.25 | 5.369              | 5.369 | 6.993 | 1.000 | 1.303 | -6.536    | -0.173     |
| 18.75                      | 31.25 | 50    |                    |       |       |       |       |           |            |
| 18.75                      | 37.5  | 43.75 |                    |       |       |       |       |           |            |
| 18.75                      | 43.75 | 37.5  | 6.107              | 5.783 | 5.783 | 1.000 | 1.056 | -6.321    | -0.137     |
| 12.5                       | 31.25 | 56.25 | 5.211              | 5.283 | 8.017 | 1.014 | 1.538 | -5.323    | -0.100     |
| 12.5                       | 37.5  | 50    | 5.442              | 5.442 | 7.107 | 1.000 | 1.306 | -5.764    | -0.151     |
| 12.5                       | 43.75 | 43.75 | 5.433              | 5.433 | 7.028 | 1.000 | 1.293 | -6.147    | -0.143     |
| 6.25                       | 31.25 | 62.5  | 5.243              | 5.243 | 8.108 | 1.000 | 1.546 | -5.116    | -0.073     |
| 6.25                       | 37.5  | 56.25 | 5.383              | 5.397 | 7.534 | 1.003 | 1.400 | -5.515    | -0.081     |
| 6.25                       | 43.75 | 50    | 5.423              | 5.423 | 7.227 | 1.000 | 1.333 | -5.962    | -0.138     |

**Table S10.** Optimized lattice constants  $a$ ,  $b$ ,  $c$  (in Å) and their ratios, the total energy  $E_{tot}$  and the formation energy  $E_{form}$  (in eV/atom) for compounds in the martensite phase from the area III.

| Area III – martensite phase |       |       |                    |       |       |       |       |           |            |
|-----------------------------|-------|-------|--------------------|-------|-------|-------|-------|-----------|------------|
| Concentration (at.%)        |       |       | Lattice parameters |       |       | $b/a$ | $c/a$ | $E_{tot}$ | $E_{form}$ |
| Ni                          | Mn    | Ga    | $a$                | $b$   | $c$   |       |       |           |            |
| 43.75                       | 50    | 6.25  | 5.105              | 5.105 | 7.336 | 1.000 | 1.437 | -7.447    | -0.154     |
| 37.5                        | 50    | 12.5  | 5.141              | 5.155 | 7.330 | 1.003 | 1.426 | -7.276    | -0.163     |
| 37.5                        | 56.25 | 6.25  | 5.131              | 5.117 | 7.232 | 0.997 | 1.410 | -7.624    | -0.120     |
| 31.25                       | 50    | 18.75 | 5.251              | 5.251 | 7.154 | 1.000 | 1.362 | -7.1      | -0.166     |
| 31.25                       | 56.25 | 12.5  | 5.162              | 5.169 | 7.247 | 1.001 | 1.404 | -7.458    | -0.134     |
| 31.25                       | 62.5  | 6.25  | 5.145              | 5.142 | 7.191 | 0.999 | 1.398 | -7.806    | -0.091     |
| 25                          | 50    | 25    | 5.362              | 5.362 | 6.868 | 1.000 | 1.281 | -6.942    | -0.188     |
| 25                          | 56.25 | 18.75 | 5.267              | 5.267 | 7.123 | 1.000 | 1.352 | -7.273    | -0.128     |
| 25                          | 62.5  | 12.5  | 5.185              | 5.185 | 7.185 | 1.000 | 1.386 | -7.636    | -0.100     |
| 25                          | 68.75 | 6.25  | 5.155              | 5.155 | 7.156 | 1.000 | 1.388 | -7.99     | -0.064     |
| 18.75                       | 50    | 31.25 | 5.416              | 5.416 | 6.959 | 1.000 | 1.285 | -6.707    | -0.133     |
| 18.75                       | 56.25 | 25    | 5.378              | 5.378 | 6.894 | 1.000 | 1.282 | -7.121    | -0.156     |
| 18.75                       | 62.5  | 18.75 | 5.282              | 5.282 | 7.009 | 1.000 | 1.327 | -7.468    | -0.112     |
| 18.75                       | 68.75 | 12.5  | 5.182              | 5.180 | 7.161 | 1.000 | 1.382 | -7.823    | -0.076     |
| 18.75                       | 75    | 6.25  | 5.156              | 5.156 | 7.109 | 1.000 | 1.379 | -8.183    | -0.045     |
| 12.5                        | 50    | 37.5  | 5.403              | 5.403 | 7.193 | 1.000 | 1.331 | -6.485    | -0.090     |
| 12.5                        | 56.25 | 31.25 | 5.392              | 5.401 | 7.025 | 1.002 | 1.303 | -6.894    | -0.108     |
| 12.5                        | 62.5  | 25    | 5.363              | 5.363 | 6.975 | 1.000 | 1.300 | -7.315    | -0.139     |
| 12.5                        | 68.75 | 18.75 | 5.251              | 5.251 | 7.102 | 1.000 | 1.353 | -7.663    | -0.096     |
| 12.5                        | 75    | 12.5  | 5.181              | 5.189 | 7.136 | 1.001 | 1.377 | -8.019    | -0.061     |
| 12.5                        | 81.25 | 6.25  | 5.149              | 5.149 | 7.098 | 1.000 | 1.379 | -8.38     | -0.031     |
| 6.25                        | 50    | 43.75 | 5.330              | 5.330 | 7.614 | 1.000 | 1.428 | -6.257    | -0.042     |
| 6.25                        | 56.25 | 37.5  | 5.370              | 5.370 | 7.294 | 1.000 | 1.358 | -6.673    | -0.067     |
| 6.25                        | 62.5  | 31.25 | 5.365              | 5.365 | 7.153 | 1.000 | 1.333 | -7.093    | -0.096     |
| 6.25                        | 68.75 | 25    | 5.344              | 5.344 | 7.091 | 1.000 | 1.327 | -7.5      | -0.112     |
| 6.25                        | 75    | 18.75 | 5.269              | 5.269 | 7.110 | 1.000 | 1.349 | -7.852    | -0.074     |
| 6.25                        | 81.25 | 12.5  | 5.205              | 5.205 | 7.103 | 1.000 | 1.365 | -8.21     | -0.041     |
| 6.25                        | 87.5  | 6.25  | 5.175              | 5.175 | 7.035 | 1.000 | 1.359 | -8.571    | -0.011     |

**Table S11.** Element resolved magnetic moments (in  $\mu_B$ ), total magnetic moments (in  $\mu_B/\text{f.u.}$ ) and favorable magnetic reference state for compounds in the austenite and martensite phase from the area I.

| Area I               |       |       |                   |                   |                    |       |                   |                   |                    |       |
|----------------------|-------|-------|-------------------|-------------------|--------------------|-------|-------------------|-------------------|--------------------|-------|
| Concentration (at.%) |       |       | Austenite         |                   |                    |       | Martensite        |                   |                    |       |
| Ni                   | Mn    | Ga    | $\mu_{\text{Mn}}$ | $\mu_{\text{Ni}}$ | $\mu_{\text{tot}}$ | Order | $\mu_{\text{Mn}}$ | $\mu_{\text{Ni}}$ | $\mu_{\text{tot}}$ | Order |
| 6.25                 | 6.25  | 87.5  |                   |                   |                    |       | 3.216             | 0.010             | 0.838              | FM    |
| 6.25                 | 12.5  | 81.25 |                   |                   |                    |       | 3.371             | 0.104             | 0.120              | FM    |
| 6.25                 | 18.75 | 75    |                   |                   |                    |       | 2.901             | -0.080            | 2.024              | FM    |
| 6.25                 | 25    | 68.75 |                   |                   |                    |       | 1.697             | -0.245            | 1.404              | FM    |
| 12.5                 | 6.25  | 81.25 |                   |                   |                    |       | 2.87              | 0.026             | 0.719              | FM    |
| 12.5                 | 12.5  | 75    |                   |                   |                    |       | 3.119             | 0.097             | 1.583              | FM    |
| 12.5                 | 18.75 | 68.75 |                   |                   |                    |       | 2.885             | 0.135             | 2.154              | FM    |
| 12.5                 | 25    | 62.5  |                   |                   |                    |       | 2.093             | 0.023             | 1.902              | FM    |
| 18.75                | 6.25  | 75    |                   |                   |                    |       | 2.69              | 0.030             | 0.618              | FM    |
| 18.75                | 12.5  | 68.75 |                   |                   |                    |       | 2.466             | 0.109             | 1.133              | FM    |
| 18.75                | 18.75 | 62.5  |                   |                   |                    |       | 2.772             | 0.115             | 2.097              | FM    |
| 18.75                | 25    | 56.25 | 2.969             | 0.086             | 3.054              | FM    | 2.561             | 0.211             | 2.643              | FM    |
| 25                   | 6.25  | 68.75 | 2.022             | 0.030             | 0.412              | FM    | 2.965             | 0.029             | 0.746              | FM    |
| 25                   | 12.5  | 62.5  |                   |                   |                    |       | 2.633             | 0.057             | 1.308              | FM    |
| 25                   | 18.75 | 56.25 | 2.849             | 0.092             | 2.211              | FM    |                   |                   |                    |       |
| 25                   | 25    | 50    | 2.945             | 0.071             | 2.998              | FM    |                   |                   |                    |       |
| 31.25                | 6.25  | 62.5  |                   |                   |                    |       | 3.015             | 0.063             | 0.814              | FM    |
| 31.25                | 12.5  | 56.25 |                   |                   |                    |       | 2.687             | 0.087             | 1.393              | FM    |
| 31.25                | 18.75 | 50    | 2.826             | 0.072             | 2.131              | FM    |                   |                   |                    |       |
| 31.25                | 25    | 43.75 | 2.973             | 0.154             | 3.132              | FM    | 2.955             | 0.134             | 3.173              | FM    |
| 37.5                 | 6.25  | 56.25 | 2.482             | 0.065             | 0.695              | FM    |                   |                   |                    |       |
| 37.5                 | 12.5  | 50    |                   |                   |                    |       | 2.464             | 0.060             | 1.170              | FM    |
| 37.5                 | 18.75 | 43.75 | 2.800             | 0.045             | 2.169              | FM    |                   |                   |                    |       |
| 37.5                 | 25    | 37.5  |                   |                   |                    |       | 3.34              | 0.287             | 3.778              | FM    |
| 43.75                | 6.25  | 50    | 2.266             | 0.050             | 0.525              | FM    |                   |                   |                    |       |
| 43.75                | 12.5  | 43.75 |                   |                   |                    |       |                   |                   |                    |       |
| 43.75                | 18.75 | 37.5  | 3.344             | 0.237             | 2.913              | FM    | 3.298             | 0.408             | 3.071              | FM    |
| 43.75                | 25    | 31.25 |                   |                   |                    |       | 3.29              | 0.432             | 4.028              | FM    |
| 50                   | 6.25  | 43.75 | 3.503             | 0.086             | 1.044              | FM    |                   |                   |                    |       |
| 50                   | 12.5  | 37.5  | 3.420             | 0.170             | 2.046              | FM    |                   |                   |                    |       |
| 50                   | 18.75 | 31.25 | 3.390             | 0.263             | 3.054              | FM    |                   |                   |                    |       |
| 50                   | 25    | 25    | 3.387             | 0.357             | 4.090              | FM    | 3.305             | 0.423             | 4.108              | FM    |
| 56.25                | 6.25  | 37.5  | 3.437             | 0.108             | 1.102              | FM    |                   |                   |                    |       |
| 56.25                | 12.5  | 31.25 | 3.433             | 0.235             | 2.242              | FM    | 3.386             | 0.326             | 2.437              | FM    |
| 56.25                | 18.75 | 25    | 3.416             | 0.338             | 3.329              | FM    | 3.347             | 0.345             | 3.375              | FM    |
| 56.25                | 25    | 18.75 | 3.355             | 0.402             | 4.261              | FM    | 3.215             | 0.372             | 4.008              | FM    |
| 62.5                 | 6.25  | 31.25 |                   |                   |                    |       | 3.394             | 0.145             | 1.205              | FM    |
| 62.5                 | 12.5  | 25    |                   |                   |                    |       | 3.34              | 0.285             | 2.356              | FM    |
| 62.5                 | 18.75 | 18.75 |                   |                   |                    |       | 3.262             | 0.353             | 3.295              | FM    |
| 62.5                 | 25    | 12.5  |                   |                   |                    |       | 3.213             | 0.361             | 4.014              | FM    |
| 68.75                | 6.25  | 25    | 3.346             | 0.126             | 1.178              | FM    | 3.242             | 0.116             | 1.112              | FM    |
| 68.75                | 12.5  | 18.75 |                   |                   |                    |       | 3.277             | 0.325             | 2.489              | FM    |
| 68.75                | 18.75 | 12.5  |                   |                   |                    |       | 3.203             | 0.417             | 3.495              | FM    |
| 68.75                | 25    | 6.25  | 3.246             | 0.345             | 4.110              | FM    | 3.151             | 0.507             | 4.496              | FM    |
| 75                   | 6.25  | 18.75 | 3.250             | 0.177             | 0.840              | FM    | 3.159             | 0.211             | 1.379              | FM    |
| 75                   | 12.5  | 12.5  | 3.298             | 0.285             | 2.362              | FM    | 3.163             | 0.447             | 2.858              | FM    |
| 75                   | 18.75 | 6.25  |                   |                   |                    |       | 3.155             | 0.502             | 3.803              | FM    |
| 81.25                | 6.25  | 12.5  |                   |                   |                    |       | 3.124             | 0.377             | 1.937              | FM    |
| 81.25                | 12.5  | 6.25  |                   |                   |                    |       | 3.216             | 0.571             | 3.376              | FM    |
| 87.5                 | 6.25  | 6.25  |                   |                   |                    |       | 3.092             | 0.501             | 2.441              | FM    |

**Table S12.** Element resolved magnetic moments (in  $\mu_B$ ), total magnetic moments (in  $\mu_B$ /f.u.) and favorable magnetic reference state for compounds in the austenite phase from the area II. Here  $\mu_{\text{Mn(Ga)}}$  and  $\mu_{\text{Mn(Ni)}}$  are the magnetic moments of Mn atoms placed at the Ga- and Ni sublattice, respectively.

|                      |       |       | Area II – austenite phase |                       |                       |                   |                    |       |
|----------------------|-------|-------|---------------------------|-----------------------|-----------------------|-------------------|--------------------|-------|
| Concentration (at.%) |       |       | $\mu_{\text{Mn}}$         | $\mu_{\text{Mn(Ga)}}$ | $\mu_{\text{Mn(Ni)}}$ | $\mu_{\text{Ni}}$ | $\mu_{\text{tot}}$ | Order |
| Ni                   | Mn    | Ga    |                           |                       |                       |                   |                    |       |
| 6.25                 | 31.25 | 62.5  |                           |                       |                       |                   |                    |       |
| 6.25                 | 37.5  | 56.25 |                           |                       |                       |                   |                    |       |
| 6.25                 | 43.75 | 50    | 1.915                     |                       | 2.321                 | 0.075             | 3.589              | FM    |
| 12.5                 | 31.25 | 56.25 |                           |                       |                       |                   |                    |       |
| 12.5                 | 37.5  | 50    |                           |                       |                       |                   |                    |       |
| 12.5                 | 43.75 | 43.75 |                           |                       |                       |                   |                    |       |
| 18.75                | 31.25 | 50    | 2.807                     |                       | 3.011                 | 0.082             | 3.535              | FM    |
| 18.75                | 37.5  | 43.75 | 2.308                     |                       | -3.174                | 0.030             | 2.065              | FIM-1 |
| 18.75                | 43.75 | 37.5  |                           |                       |                       |                   |                    |       |
| 25                   | 31.25 | 43.75 | 2.652                     |                       | 2.699                 | 0.136             | 3.416              | FM    |
| 25                   | 37.5  | 37.5  |                           |                       |                       |                   |                    |       |
| 25                   | 43.75 | 31.25 |                           |                       |                       |                   |                    |       |
| 31.25                | 31.25 | 37.5  |                           |                       |                       |                   |                    |       |
| 31.25                | 37.5  | 31.25 |                           |                       |                       |                   |                    |       |
| 31.25                | 43.75 | 25    |                           |                       |                       |                   |                    |       |
| 37.5                 | 31.25 | 31.25 | 3.271                     |                       | -2.792                | 0.306             | 3.051              | FIM-1 |
| 37.5                 | 37.5  | 25    | 3.184                     |                       | -1.225                | 0.371             | 3.162              | FIM-1 |
| 37.5                 | 43.75 | 18.75 |                           |                       |                       |                   |                    |       |
| 43.75                | 31.25 | 25    | 3.238                     |                       | -2.841                | 0.266             | 2.983              | FIM-1 |
| 43.75                | 37.5  | 18.75 | 3.305                     |                       | -2.720                | 0.429             | 4.232              | FIM-1 |
| 43.75                | 43.75 | 12.5  | 3.364                     |                       | -2.699                | 0.563             | 5.426              | FIM-1 |
| 50                   | 31.25 | 18.75 | 3.368                     | -3.515                |                       | 0.304             | 3.078              | FIM-2 |
| 50                   | 37.5  | 12.5  |                           |                       |                       |                   |                    |       |
| 50                   | 43.75 | 6.25  | 3.442                     | -3.465                |                       | 0.094             | 0.899              | FIM-2 |
| 56.25                | 31.25 | 12.5  |                           |                       |                       |                   |                    |       |
| 56.25                | 37.5  | 6.25  |                           |                       |                       |                   |                    |       |
| 62.5                 | 31.25 | 6.25  |                           |                       |                       |                   |                    |       |

**Table S13.** Element resolved magnetic moments (in  $\mu_B$ ), total magnetic moments (in  $\mu_B/\text{f.u.}$ ) and favorable magnetic reference state for compounds in the martensite phase from the area II. Here  $\mu_{\text{Mn}(\text{Ga})}$  and  $\mu_{\text{Mn}(\text{Ni})}$  are the magnetic moments of Mn atoms placed at the Ga- and Ni sublattice, respectively.

|                      |       |       | Area II – martensite phase |                              |                              |                   |                    | Order    |
|----------------------|-------|-------|----------------------------|------------------------------|------------------------------|-------------------|--------------------|----------|
| Concentration (at.%) |       |       | $\mu_{\text{Mn}}$          | $\mu_{\text{Mn}(\text{Ga})}$ | $\mu_{\text{Mn}(\text{Ni})}$ | $\mu_{\text{Ni}}$ | $\mu_{\text{tot}}$ |          |
| Ni                   | Mn    | Ga    |                            |                              |                              |                   |                    |          |
| 6.25                 | 31.25 | 62.5  | 2.336                      |                              | 2.851                        | 0.069             | 2.861              | FM       |
| 6.25                 | 37.5  | 56.25 | 2.503                      |                              | 2.621                        | 0.127             | 3.675              | FM       |
| 6.25                 | 43.75 | 50    | 2.595                      |                              | 2.471                        | 0.100             | 4.354              | FM       |
| 12.5                 | 31.25 | 56.25 | 2.682                      |                              | 3.057                        | 0.330             | 3.449              | FM       |
| 12.5                 | 37.5  | 50    | 2.504                      |                              | 2.388                        | 0.040             | 3.598              | FM       |
| 12.5                 | 43.75 | 43.75 | 2.474                      | -3.081                       | 2.228                        | 0.077             | 2.699              | FIM-2    |
| 18.75                | 31.25 | 50    |                            |                              |                              |                   |                    |          |
| 18.75                | 37.5  | 43.75 |                            |                              |                              |                   |                    |          |
| 18.75                | 43.75 | 37.5  | 2.630                      | -3.033                       | 0.366                        | 0.036             | 1.128              | FIM-2    |
| 25                   | 31.25 | 43.75 | 2.713                      |                              | -3.082                       | 0.072             | 1.981              | FIM-1    |
| 25                   | 37.5  | 37.5  | 3.232                      |                              | -2.573                       | 0.445             | 2.456              | FIM-1    |
| 25                   | 43.75 | 31.25 | 3.105                      |                              | -2.184                       | 0.437             | 1.932              | FIM-1    |
| 31.25                | 31.25 | 37.5  | 3.011                      |                              | 1.887                        | 0.069             | 3.821              | FM       |
| 31.25                | 37.5  | 31.25 | 3.156                      |                              | -2.153                       | 0.426             | 2.622              | FIM-1    |
| 31.25                | 43.75 | 25    | 3.045                      |                              | -2.271                       | 0.378             | 1.810              | FIM-1    |
| 37.5                 | 31.25 | 31.25 | 3.244                      |                              | -2.339                       | 0.442             | 3.337              | FIM-1    |
| 37.5                 | 37.5  | 25    | 3.097                      |                              | -2.192                       | 0.392             | 2.572              | FIM-1    |
| 37.5                 | 43.75 | 18.75 | 3.061                      | 3.038                        | -2.267                       | 0.469             | 3.396              | FIM-1    |
| 43.75                | 31.25 | 25    | 3.176                      |                              | -2.464                       | 0.399             | 3.245              | FIM-1    |
| 43.75                | 37.5  | 18.75 | 3.114                      | -3.281                       | -2.633                       |                   | 2.103              | FIM-1(2) |
| 43.75                | 43.75 | 12.5  | 3.053                      | -3.169                       | -2.693                       | 0.135             | 1.005              | FIM-1(2) |
| 50                   | 31.25 | 18.75 | 3.226                      | -3.364                       |                              | 0.283             | 2.902              | FIM-2    |
| 50                   | 37.5  | 12.5  | 3.190                      | -3.247                       |                              | 0.203             | 1.936              | FIM-2    |
| 50                   | 43.75 | 6.25  | 3.137                      | -3.156                       |                              | 0.108             | 0.965              | FIM-2    |
| 56.25                | 31.25 | 12.5  | 3.177                      | -3.291                       |                              | 0.264             | 2.911              | FIM-2    |
| 56.25                | 37.5  | 6.25  | 3.122                      | -3.201                       |                              | 0.162             | 1.863              | FIM-2    |
| 62.5                 | 31.25 | 6.25  | 3.090                      | -3.211                       |                              | 0.226             | 2.823              | FIM-2    |



**Table S14.** Element resolved magnetic moments (in  $\mu_B$ ), total magnetic moments (in  $\mu_B/\text{f.u.}$ ) and favorable magnetic reference state for compounds in the austenite phase from the area III. Here  $\mu_{\text{Mn}(4a)}$  and  $\mu_{\text{Mn}(4b)}$  are the magnetic moments of Mn atoms, which occupy 4a and 4b Wyckoff sites while  $\mu_{\text{Mn}(\text{Ga})}$  and  $\mu_{\text{Mn}(\text{Ni})}$  are the Mn magnetic moments at the Ga- and Ni sites, respectively.

| Area III – austenite phase |       |       |                          |                          |                                 |                                 |                   |                    |       |
|----------------------------|-------|-------|--------------------------|--------------------------|---------------------------------|---------------------------------|-------------------|--------------------|-------|
| Concentration (at.%)       |       |       | $\mu_{\text{Mn}^{(4a)}}$ | $\mu_{\text{Mn}^{(4b)}}$ | $\mu_{\text{Mn}^{(\text{Ga})}}$ | $\mu_{\text{Mn}^{(\text{Ni})}}$ | $\mu_{\text{Ni}}$ | $\mu_{\text{tot}}$ | Order |
| Ni                         | Mn    | Ga    |                          |                          |                                 |                                 |                   |                    |       |
| 6.25                       | 50    | 43.75 | -2.927                   | 3.015                    |                                 |                                 | 0.060             | 0.124              | FIM-3 |
| 6.25                       | 56.25 | 37.5  | -2.812                   | 2.945                    |                                 | 0.471                           | 0.039             | 0.269              | FIM-3 |
| 6.25                       | 62.5  | 31.25 | -2.293                   | 2.982                    |                                 | -0.097                          | 0.236             | 0.760              | FIM-7 |
| 6.25                       | 68.75 | 25    | -1.748                   | 2.990                    |                                 | -1.233                          | 0.229             | 0.456              | FIM-7 |
| 6.25                       | 75    | 18.75 | -1.460                   | 2.885                    | 2.636                           | -1.137                          | 0.345             | 1.391              | FIM-7 |
| 6.25                       | 81.25 | 12.5  |                          |                          |                                 |                                 |                   |                    |       |
| 6.25                       | 87.5  | 6.25  |                          |                          |                                 |                                 |                   |                    |       |
| 12.5                       | 50    | 37.5  | -2.899                   | 3.003                    |                                 | 0.087                           | 0.034             | 0.150              | FIM-3 |
| 12.5                       | 56.25 | 31.25 | -2.495                   | 3.044                    |                                 | 0.490                           | 0.236             | 0.847              | FIM-3 |
| 12.5                       | 62.5  | 25    | -1.959                   | 3.021                    |                                 | -0.911                          | 0.294             | 0.832              | FIM-7 |
| 12.5                       | 68.75 | 18.75 | -1.830                   | 2.979                    | 2.798                           | -0.682                          | 0.384             | 1.778              | FIM-7 |
| 12.5                       | 75    | 12.5  |                          |                          |                                 |                                 |                   |                    |       |
| 12.5                       | 81.25 | 6.25  |                          |                          |                                 |                                 |                   |                    |       |
| 18.75                      | 50    | 31.25 | -2.710                   | 3.102                    |                                 |                                 | 0.209             | 0.587              | FIM-3 |
| 18.75                      | 56.25 | 25    | -2.153                   | 3.065                    |                                 | -0.503                          | 0.326             | 1.109              | FIM-7 |
| 18.75                      | 62.5  | 18.75 | -2.107                   | 3.055                    | 2.893                           | -0.173                          | 0.376             | 1.997              | FIM-7 |
| 18.75                      | 68.75 | 12.5  |                          |                          |                                 |                                 |                   |                    |       |
| 18.75                      | 75    | 6.25  |                          |                          |                                 |                                 |                   |                    |       |
| 25                         | 50    | 25    | -2.345                   | 3.131                    |                                 |                                 | 0.329             | 1.191              | FIM-3 |
| 25                         | 56.25 | 18.75 | -2.397                   | 3.155                    | 3.004                           |                                 | 0.329             | 1.930              | FIM-3 |
| 25                         | 62.5  | 12.5  | -2.394                   | 3.147                    | 3.095                           |                                 | 0.413             | 2.827              | FIM-3 |
| 25                         | 68.75 | 6.25  |                          |                          |                                 |                                 |                   |                    |       |
| 31.25                      | 50    | 18.75 | -2.755                   | 3.148                    |                                 |                                 | 0.259             | 0.566              | FIM-3 |
| 31.25                      | 56.25 | 12.5  |                          |                          |                                 |                                 |                   |                    |       |
| 31.25                      | 62.5  | 6.25  |                          |                          |                                 |                                 |                   |                    |       |
| 37.5                       | 50    | 12.5  |                          |                          |                                 |                                 |                   |                    |       |
| 37.5                       | 56.25 | 6.25  |                          |                          |                                 |                                 |                   |                    |       |
| 43.75                      | 50    | 6.25  | -2.791                   | 2.942                    |                                 |                                 | 0.436             | 0.213              | FIM-3 |

**Table S15.** Element resolved magnetic moments (in  $\mu_B$ ), total magnetic moments (in  $\mu_B/\text{f.u.}$ ) and favorable magnetic reference state for compounds in the martensite phase from the area III. Here  $\mu_{\text{Mn}(4a)}$  and  $\mu_{\text{Mn}(4b)}$  are the magnetic moments of Mn atoms, which occupy 4a and 4b Wyckoff sites while  $\mu_{\text{Mn}(\text{Ga})}$  and  $\mu_{\text{Mn}(\text{Ni})}$  are the Mn magnetic moments at the Ga- and Ni sites, respectively.

| Area III – martensite phase |       |       |                          |                          |                                 |                                 |                   |                    |       |
|-----------------------------|-------|-------|--------------------------|--------------------------|---------------------------------|---------------------------------|-------------------|--------------------|-------|
| Concentration (at.%)        |       |       | $\mu_{\text{Mn}}^{(4a)}$ | $\mu_{\text{Mn}}^{(4b)}$ | $\mu_{\text{Mn}}^{(\text{Ga})}$ | $\mu_{\text{Mn}}^{(\text{Ni})}$ | $\mu_{\text{Ni}}$ | $\mu_{\text{tot}}$ | Order |
| Ni                          | Mn    | Ga    |                          |                          |                                 |                                 |                   |                    |       |
| 6.25                        | 50    | 43.75 | -2.835                   | 2.718                    |                                 |                                 | 0.200             | 0.191              | FIM-3 |
| 6.25                        | 56.25 | 37.5  | -2.522                   | 2.933                    |                                 | -0.832                          | 0.232             | 0.310              | FIM-7 |
| 6.25                        | 62.5  | 31.25 | -2.391                   | 2.945                    |                                 | -1.879                          | 0.109             | 0.292              | FIM-7 |
| 6.25                        | 68.75 | 25    | -2.373                   | 2.885                    |                                 | -2.213                          | 0.067             | 1.110              | FIM-7 |
| 6.25                        | 75    | 18.75 | -2.251                   | 2.622                    | 2.127                           | -2.113                          | 0.061             | 0.647              | FIM-7 |
| 6.25                        | 81.25 | 12.5  | -2.154                   | 2.381                    | 2.039                           | -2.066                          | 0.074             | 0.270              | FIM-7 |
| 6.25                        | 87.5  | 6.25  | -2.048                   | 2.121                    | 2.005                           | -2.072                          | 0.124             | 0.056              | FIM-7 |
| 12.5                        | 50    | 37.5  | -2.693                   | 2.814                    |                                 |                                 | 0.029             | 0.117              | FIM-3 |
| 12.5                        | 56.25 | 31.25 | -2.346                   | 2.969                    |                                 | -1.718                          | 0.245             | 0.365              | FIM-7 |
| 12.5                        | 62.5  | 25    | -2.332                   | 2.918                    |                                 | -2.144                          | 0.171             | 0.352              | FIM-7 |
| 12.5                        | 68.75 | 18.75 | -2.248                   | 2.641                    | 2.048                           | -2.073                          | 0.105             | 0.046              | FIM-7 |
| 12.5                        | 75    | 12.5  | -2.216                   | 2.409                    | 2.003                           | -2.114                          | 0.101             | 0.212              | FIM-7 |
| 12.5                        | 81.25 | 6.25  | -2.146                   | 2.221                    | 2.007                           | -2.167                          | 0.094             | 0.562              | FIM-7 |
| 18.75                       | 50    | 31.25 | -2.483                   | 2.962                    |                                 |                                 | 0.237             | 0.694              | FIM-3 |
| 18.75                       | 56.25 | 25    | -2.321                   | 2.959                    |                                 | -2.039                          | 0.236             | 0.352              | FIM-7 |
| 18.75                       | 62.5  | 18.75 | -2.290                   | 2.754                    | 2.229                           | -1.933                          | 0.232             | 0.754              | FIM-7 |
| 18.75                       | 68.75 | 12.5  | -2.449                   | 2.524                    | 2.1315                          | -2.027                          | 0.176             | 0.787              | FIM-7 |
| 18.75                       | 75    | 6.25  | -2.354                   | 2.356                    | 2.199                           | -2.124                          | 0.223             | 1.310              | FIM-7 |
| 25                          | 50    | 25    | -2.294                   | 2.997                    |                                 |                                 | 0.262             | 1.021              | FIM-3 |
| 25                          | 56.25 | 18.75 | -2.370                   | 2.858                    | 2.333                           |                                 | 0.262             | 1.398              | FIM-3 |
| 25                          | 62.5  | 12.5  | -2.618                   | 2.640                    | 2.344                           |                                 | 0.239             | 1.467              | FIM-3 |
| 25                          | 68.75 | 6.25  | -2.527                   | 2.495                    | 2.398                           |                                 | 0.279             | 2.079              | FIM-3 |
| 31.25                       | 50    | 18.75 | -2.744                   | 2.996                    |                                 |                                 | 0.168             | 0.351              | FIM-3 |
| 31.25                       | 56.25 | 12.5  | -2.789                   | 2.770                    | 2.455                           |                                 | 0.168             | 0.731              | FIM-3 |
| 31.25                       | 62.5  | 6.25  | -2.710                   | 2.683                    | 2.5235                          |                                 | 0.231             | 1.480              | FIM-3 |
| 37.5                        | 50    | 12.5  | -2.969                   | 2.960                    |                                 |                                 | 0.081             | 0.030              | FIM-3 |
| 37.5                        | 56.25 | 6.25  | -2.822                   | 2.820                    | 2.549                           |                                 | 0.159             | 0.778              | FIM-3 |
| 43.75                       | 50    | 6.25  | -3.052                   | 2.997                    |                                 |                                 | 0.031             | 0.127              | FIM-3 |

**Table S16.** Martensitic transition temperature  $T_m$  (in K) for compositions from the areas I, II, and III.

| Area I               |       |       |       | Area II              |       |       |       | Area III             |       |       |       |
|----------------------|-------|-------|-------|----------------------|-------|-------|-------|----------------------|-------|-------|-------|
| Concentration (at.%) |       |       | $T_m$ | Concentration (at.%) |       |       | $T_m$ | Concentration (at.%) |       |       | $T_m$ |
| Ni                   | Mn    | Ga    |       | Ni                   | Mn    | Ga    |       | Ni                   | Mn    | Ga    |       |
| 6.25                 | 6.25  | 87.5  | 23    | 62.5                 | 31.25 | 6.25  | 244   | 43.75                | 50    | 6.25  | 1160  |
| 6.25                 | 12.5  | 81.25 |       | 56.25                | 31.25 | 12.5  |       | 37.5                 | 50    | 12.5  |       |
| 6.25                 | 18.75 | 75    |       | 56.25                | 37.5  | 6.25  |       | 37.5                 | 56.25 | 6.25  |       |
| 6.25                 | 25    | 68.75 |       | 50                   | 31.25 | 18.75 |       | 31.25                | 50    | 18.75 |       |
| 12.5                 | 6.25  | 81.25 |       | 50                   | 37.5  | 12.5  |       | 31.25                | 56.25 | 12.5  |       |
| 12.5                 | 12.5  | 75    |       | 50                   | 43.75 | 6.25  |       | 31.25                | 62.5  | 6.25  |       |
| 12.5                 | 18.75 | 68.75 |       | 43.75                | 31.25 | 25    |       | 25                   | 50    | 25    |       |
| 12.5                 | 25    | 62.5  |       | 43.75                | 37.5  | 18.75 |       | 25                   | 56.25 | 18.75 |       |
| 18.75                | 6.25  | 75    |       | 43.75                | 43.75 | 12.5  |       | 25                   | 62.5  | 12.5  |       |
| 18.75                | 12.5  | 68.75 |       | 37.5                 | 31.25 | 31.25 |       | 25                   | 68.75 | 6.25  |       |
| 18.75                | 18.75 | 62.5  | 510   | 37.5                 | 37.5  | 25    | 151   | 18.75                | 50    | 31.25 | 174   |
| 18.75                | 25    | 56.25 |       | 37.5                 | 43.75 | 18.75 |       | 18.75                | 56.25 | 25    |       |
| 25                   | 6.25  | 68.75 |       | 31.25                | 31.25 | 37.5  |       | 18.75                | 62.5  | 18.75 |       |
| 25                   | 12.5  | 62.5  |       | 31.25                | 37.5  | 31.25 |       | 18.75                | 68.75 | 12.5  |       |
| 25                   | 18.75 | 56.25 |       | 31.25                | 43.75 | 25    |       | 18.75                | 75    | 6.25  |       |
| 25                   | 25    | 50    |       | 25                   | 31.25 | 43.75 |       | 12.5                 | 50    | 37.5  |       |
| 31.25                | 6.25  | 62.5  |       | 25                   | 37.5  | 37.5  |       | 12.5                 | 56.25 | 31.25 |       |
| 31.25                | 12.5  | 56.25 |       | 25                   | 43.75 | 31.25 |       | 12.5                 | 62.5  | 25    |       |
| 31.25                | 18.75 | 50    |       | 18.75                | 31.25 | 50    |       | 12.5                 | 68.75 | 18.75 |       |
| 31.25                | 25    | 43.75 |       | 18.75                | 37.5  | 43.75 |       | 12.5                 | 75    | 12.5  |       |
| 37.5                 | 6.25  | 56.25 | 35    | 18.75                | 43.75 | 37.5  | 162   | 12.5                 | 81.25 | 6.25  | 383   |
| 37.5                 | 12.5  | 50    |       | 12.5                 | 31.25 | 56.25 |       | 6.25                 | 50    | 43.75 |       |
| 37.5                 | 18.75 | 43.75 |       | 12.5                 | 37.5  | 50    |       | 6.25                 | 56.25 | 37.5  |       |
| 37.5                 | 25    | 37.5  |       | 12.5                 | 43.75 | 43.75 |       | 6.25                 | 62.5  | 31.25 |       |
| 43.75                | 6.25  | 50    |       | 6.25                 | 31.25 | 62.5  |       | 6.25                 | 68.75 | 25    |       |
| 43.75                | 12.5  | 43.75 |       | 6.25                 | 37.5  | 56.25 |       | 6.25                 | 75    | 18.75 |       |
| 43.75                | 18.75 | 37.5  |       | 6.25                 | 43.75 | 50    |       | 6.25                 | 81.25 | 12.5  |       |
| 43.75                | 25    | 31.25 |       |                      |       |       |       | 6.25                 | 87.5  | 6.25  |       |
| 50                   | 6.25  | 43.75 |       |                      |       |       |       |                      |       |       |       |
| 50                   | 12.5  | 37.5  |       |                      |       |       |       |                      |       |       |       |
| 50                   | 18.75 | 31.25 | 93    |                      |       |       | 684   |                      |       |       | 534   |
| 50                   | 25    | 25    |       |                      |       |       |       |                      |       |       |       |
| 56.25                | 6.25  | 37.5  |       |                      |       |       |       |                      |       |       |       |
| 56.25                | 12.5  | 31.25 |       |                      |       |       |       |                      |       |       |       |
| 56.25                | 18.75 | 25    |       |                      |       |       |       |                      |       |       |       |
| 56.25                | 25    | 18.75 |       |                      |       |       |       |                      |       |       |       |
| 62.5                 | 6.25  | 31.25 |       |                      |       |       |       |                      |       |       |       |
| 62.5                 | 12.5  | 25    |       |                      |       |       |       |                      |       |       |       |
| 62.5                 | 18.75 | 18.75 |       |                      |       |       |       |                      |       |       |       |
| 62.5                 | 25    | 12.5  |       |                      |       |       |       |                      |       |       |       |
| 68.75                | 6.25  | 25    | 266   |                      |       |       |       |                      |       |       | 545   |
| 68.75                | 12.5  | 18.75 |       |                      |       |       |       |                      |       |       |       |
| 68.75                | 18.75 | 12.5  |       |                      |       |       |       |                      |       |       |       |
| 68.75                | 25    | 6.25  |       |                      |       |       |       |                      |       |       |       |
| 75                   | 6.25  | 18.75 |       |                      |       |       |       |                      |       |       |       |
| 75                   | 12.5  | 12.5  |       |                      |       |       |       |                      |       |       |       |
| 75                   | 18.75 | 6.25  |       |                      |       |       |       |                      |       |       |       |
| 81.25                | 6.25  | 12.5  |       |                      |       |       |       |                      |       |       |       |
| 81.25                | 12.5  | 6.25  |       |                      |       |       |       |                      |       |       |       |
| 87.5                 | 6.25  | 6.25  |       |                      |       |       |       |                      |       |       |       |
